# Supplementary material for: Interactions of graphene oxide with luminescent biofunctionalized semiconductor nanoparticles: simultaneous monitoring in a protein–semiconductor coupled system
Source: Royal Society of Chemistry journal article supplement (doi:10.1039/c5ra17191a), 2015-01-01
Supplement: c5ra17191a1.pdf [file c5ra17191a1.pdf]

## Interactions of Graphene Oxide with Luminescent Biofunctionalized Semiconductor Nanoparticles: Simultaneous Monitoring in a Protein-Semiconductor Coupled System

### Supplementary information

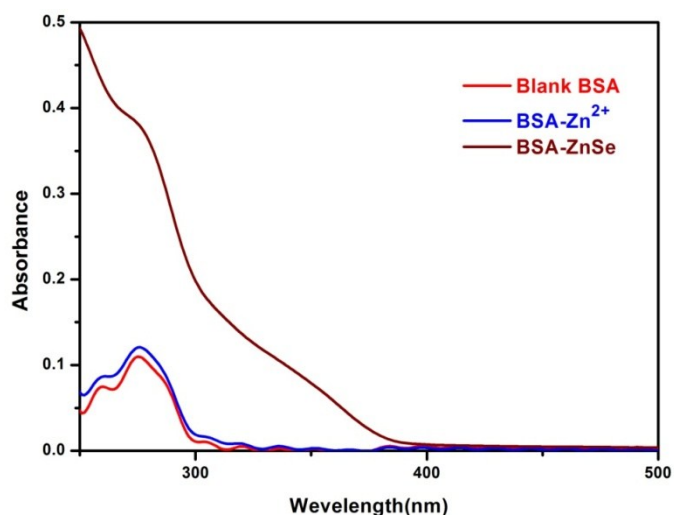

**Fig. SA1.** Absorption spectra for blank BSA, BSA-Zn<sup>2+</sup> complex and BSA-ZnSe NPs

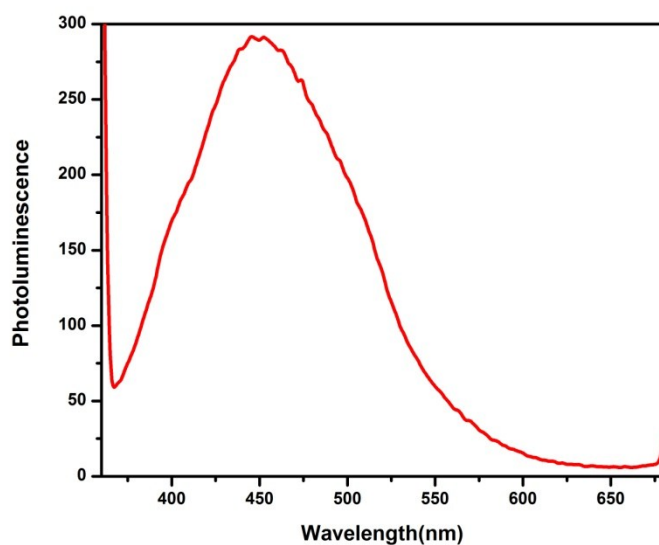

**Fig. SA2.** Emission profile for BSA-ZnSe NPs at an excitation of 350 nm

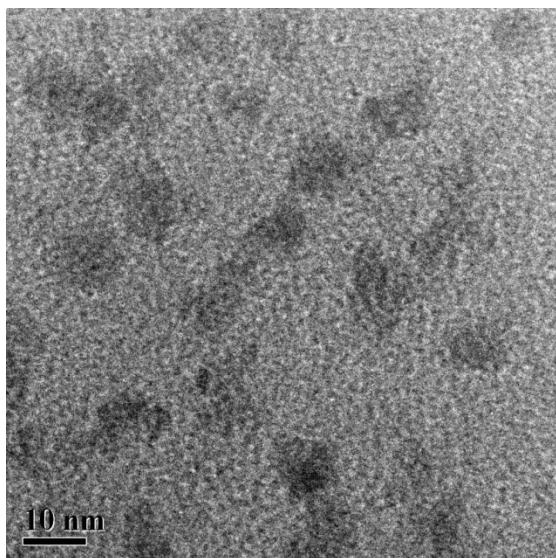

Fig. SA3. A typical TEM image of BSA-ZnSe NPs

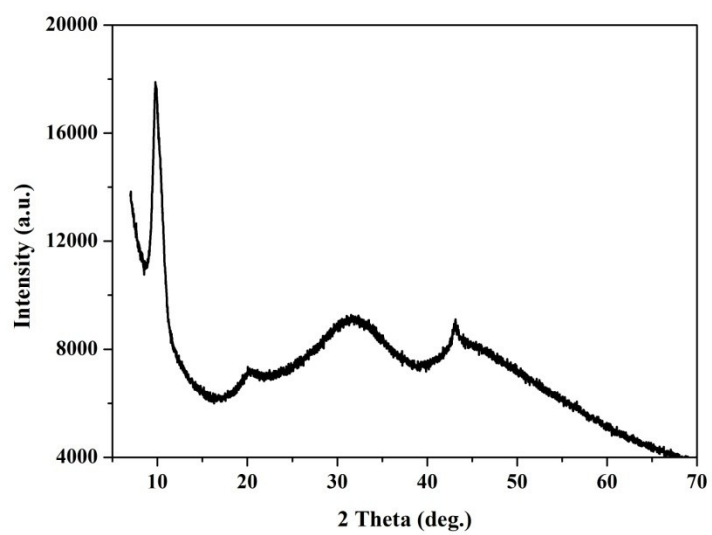

Fig. SA4. XRD pattern for graphene oxide

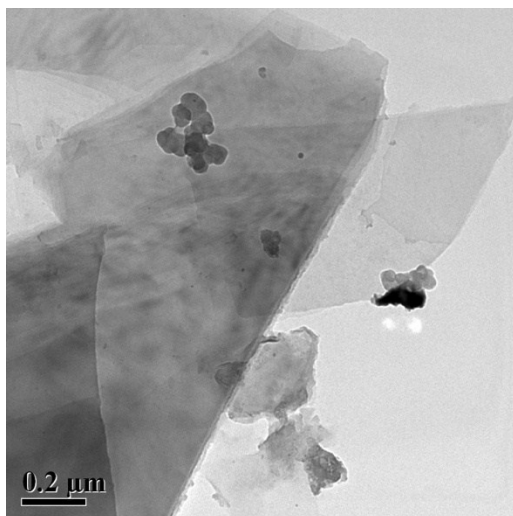

Fig. SA5. A typical TEM image of graphene oxide

## Methods

### *X-ray Diffraction (XRD) Analysis*

The asynthesised GO were characterized by X-ray diffraction (XRD) patterns using a Philips Analytical X-ray B.V. diffractometer type-PW1710 equipped with graphite monochromatized Cu K $\alpha$  radiation ( $\lambda = 1.54056 \text{ \AA}$ ). Scanning rate employed was  $0.02^\circ$  per 2 s in  $2\theta$  range from  $10^\circ$  to  $80^\circ$ . The nanocrystallite powder was pressed inside the sample holder and X-ray data were collected in the step scan mode at generator tension of 40 kV and current 20 mA.

### *Transmission electron microscopy (TEM)*

TEM measurements were carried out on a FEI, Technai S-twin with an acceleration voltage of 200 kV. A drop of aqueous solution of ZnSe NPs was placed on a carbon-coated copper grid of 400 mesh and dried under IR lamp before putting into TEM sample chamber. GO sample for TEM measurements was prepared in the same way.
